# Supplementary material for: CDK12 Promotes Cervical Cancer Progression through Enhancing Macrophage Infiltration
Source: Hindawi journal article supplement (doi:10.1155/2021/6645885), 2021-02-11
Supplement: f1 [file 6645885.f1.pdf]

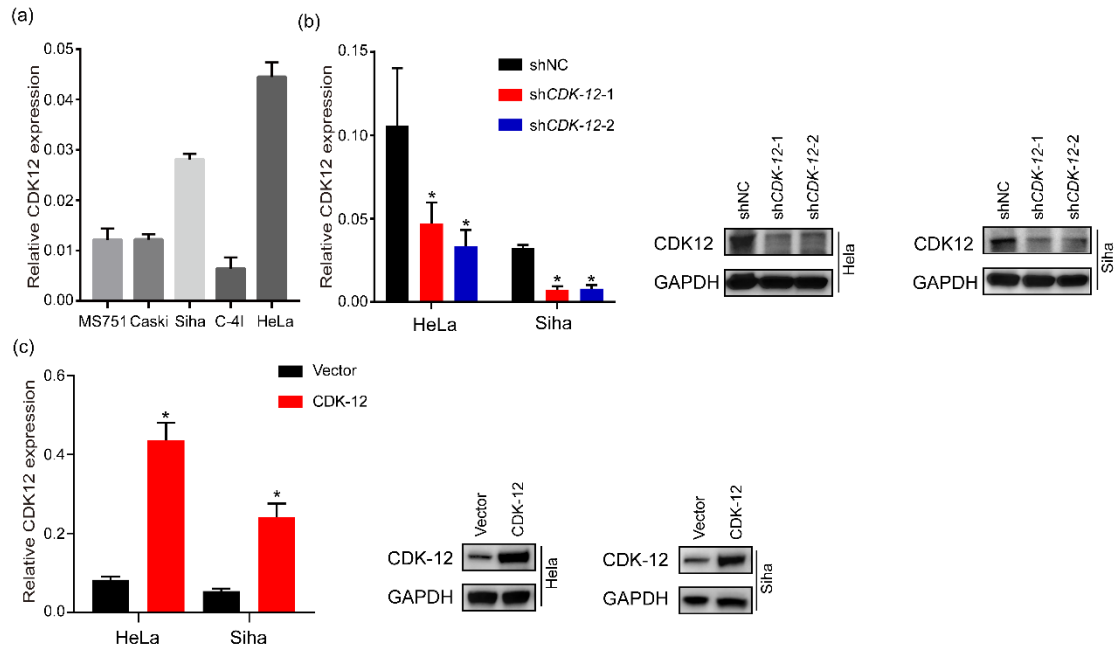

**Supplementary Figure 1** (a) The expression of *CDK12* mRNA was detected by real-time quantitative PCR in CC cell lines. (b) Interfere efficacy of *CDK12* in HeLa and Siha cells with either shRNA (sh *CDK12*-1, sh*CDK12*-2) or shNC were analyzed by qRT-PCR and western blotting. (c) Over-expression efficacy of *CDK12* in HeLa and Siha cells with *CDK12* or vector were analyzed by qRT-PCR and western blotting.
